# Supplementary material for: Serum granulocyte-macrophage colony-stimulating factor (GM-CSF) is increased in patients with active radiographic axial spondyloarthritis and persists despite anti-TNF treatment
Source: PubMed Central journal article supplement (PMC9380324; doi:10.1186/s13075-022-02888-6), 2022-08-16
Supplement: 13075_2022_2888_MOESM1_ESM.pdf [file 13075_2022_2888_MOESM1_ESM.pdf]

|            |     |     | Suppl. Table 1: Single patient data |                                  |                |      |              |     |               |      |        |     |       |     |     |     |
|------------|-----|-----|-------------------------------------|----------------------------------|----------------|------|--------------|-----|---------------|------|--------|-----|-------|-----|-----|-----|
| Patient ID | Sex | Age | Symptom Duration                    | Disease duration since diagnosis | GM-CSF (pg/ml) |      | SOST (pg/ml) |     | Dkk-1 (pg/ml) |      | BASDAI |     | ASDAS |     | CRP |     |
|            |     |     |                                     |                                  | BL             | FU   | BL           | FU  | BL            | FU   | BL     | FU  | BL    | FU  | BL  | FU  |
| 1.         | M   | 52  | 10.0                                | 6.0                              | 49             | 34   | 455          | 375 | 520           | 940  | 5.6    | 3.6 | 3.2   | 1.7 | 0.5 | 0.2 |
| 2.         | F   | 35  | 5.0                                 | 0.5                              | 39             | 107  | 316          | 451 | 770           | 290  | 6.0    |     | 3.0   |     | 0.3 |     |
| 3.         | M   | 39  | 7.0                                 | 1.5                              | 69             | 50   | 324          | 396 | 190           | 520  | 7.5    | 7.4 | 3.6   | 3.2 | 0.3 | 0.5 |
| 4.         | F   | 52  | 29.0                                | 25.0                             | 58             | 37   | 280          | 367 | 5480          | 3290 | 10.8   | 3.7 | 3.4   | 1.7 | 0.5 | 0.1 |
| 5.         | M   | 23  | 11.0                                | 0.5                              | 72             | 70   | 436          | 276 | 2330          | 1380 | 3.0    | 3.8 | 1.7   | 1.9 | 0.1 | 0.0 |
| 6.         | M   | 22  | 4.0                                 | 0.5                              | 1114           | 1008 | 476          | 535 | 1360          | 1110 | 7.9    |     | 4.4   |     | 1.2 |     |
| 7.         | F   | 25  | 6.0                                 | 0.5                              | 58             | 46   | 342          | 327 | 160           | 130  | 6.4    | 5.1 | 3.2   | 2.7 | 0.1 | 0.3 |
| 8.         | F   | 48  | 3.5                                 | 1.5                              | 47             | 46   | 371          | 360 | 170           | 0    | 3.8    | 2.1 | 2.5   | 1.7 | 1.2 | 0.0 |
| 9.         | F   | 52  | 18.0                                | 13.0                             | 53             | 42   | 393          | 418 | 730           | 1000 | 6.5    | 5.9 | 3.1   | 2.6 | 0.0 | 0.1 |
| 10.        | M   | 40  | 0.5                                 | 0.5                              | 53             | 56   | 251          | 251 | 680           | 1050 | 6.0    | 2.2 | 3.2   | 1.6 | 1.1 | 0.4 |
| 11.        | M   | 31  | 7.0                                 | 5.0                              | 70             | 41   | 484          | 396 | 1500          | 1340 | 5.2    | 2.4 | 3.8   | 1.6 | 1.5 | 0.0 |
| 12.        | M   | 26  | 1.0                                 | 0.5                              | 118            | 283  | 302          | 400 | 840           | 650  | 6.4    | 5.0 | 3.5   | 3.0 | 0.1 | 0.0 |

| <b>Suppl. Table 2: Individual control data</b> |            |            |                       |                     |                      |
|------------------------------------------------|------------|------------|-----------------------|---------------------|----------------------|
| <b>Control ID</b>                              | <b>Sex</b> | <b>Age</b> | <b>GM-CSF (pg/mL)</b> | <b>SOST (pg/mL)</b> | <b>Dkk-1 (pg/mL)</b> |
| 1.                                             | M          | 25         | 67                    | 513                 | 3120                 |
| 2.                                             | M          | 23         | 162                   | 400                 | 2550                 |
| 3.                                             | M          | 52         | 27                    | 789                 | 1700                 |
| 4.                                             | F          | 53         | 43                    | 345                 | 3200                 |
| 5.                                             | M          | 42         | 27                    | 305                 | 4780                 |
| 6.                                             | F          | 24         | 123                   | 1505                | 2150                 |
| 7.                                             | F          | 35         | 37                    | 400                 | 2950                 |
| 8.                                             | F          | 45         | 43                    | 415                 | 4480                 |
| 9.                                             | M          | 26         | 38                    | 480                 | 5520                 |
| 10.                                            | M          | 55         | 31                    | 502                 | 4250                 |
| 11.                                            | F          | 54         | 23                    | 273                 | 2420                 |
| 12.                                            | M          | 32         | 46                    | 469                 | 1130                 |
| 13.                                            | M          | 22         | 82                    | 411                 | 3180                 |
| 14.                                            | M          | 53         | 30                    | 287                 | 3980                 |
| 15.                                            | M          | 39         | 178                   | 1298                | 2660                 |
| 16.                                            | M          | 32         | 37                    | 305                 | 760                  |
